# Supplementary material for: Assessment of Drug Activities against Giardia Using Hyperspectral Raman Microscopy
Source: MDPI journal article supplement (doi:10.3390/pathogens13050358), 2024-04-27
Supplement: s1 [file s1]

Article

# Assessment of Drug Activities against *Giardia* Using Hyperspectral Raman Microscopy

Felicia S. Manciu <sup>1,2,\*</sup>, Jose Guerrero <sup>1</sup>, Breanna C. Pence <sup>3</sup>, Lizbeth V. Martinez Lopez <sup>1</sup> and Siddhartha Das <sup>2,3,\*</sup>

<sup>1</sup> Department of Physics, University of Texas at El Paso, El Paso, TX 79968, USA; jaguerrero9@miners.utep.edu (J.G.); lmartinezl@miners.utep.edu (L.V.M.L.)

<sup>2</sup> Border Biomedical Research Center, University of Texas at El Paso, El Paso, TX 79968, USA

<sup>3</sup> Department of Biological Sciences, University of Texas at El Paso, El Paso, TX 79968, USA; bcpence@miners.utep.edu

\* Correspondence: fsmanciu@utep.edu (F.S.M.); sdas@utep.edu (S.D.); Tel.: +1-915-747-8472 (F.S.M.); +1-915-747-6896 (S.D.)

## Supplementary Materials

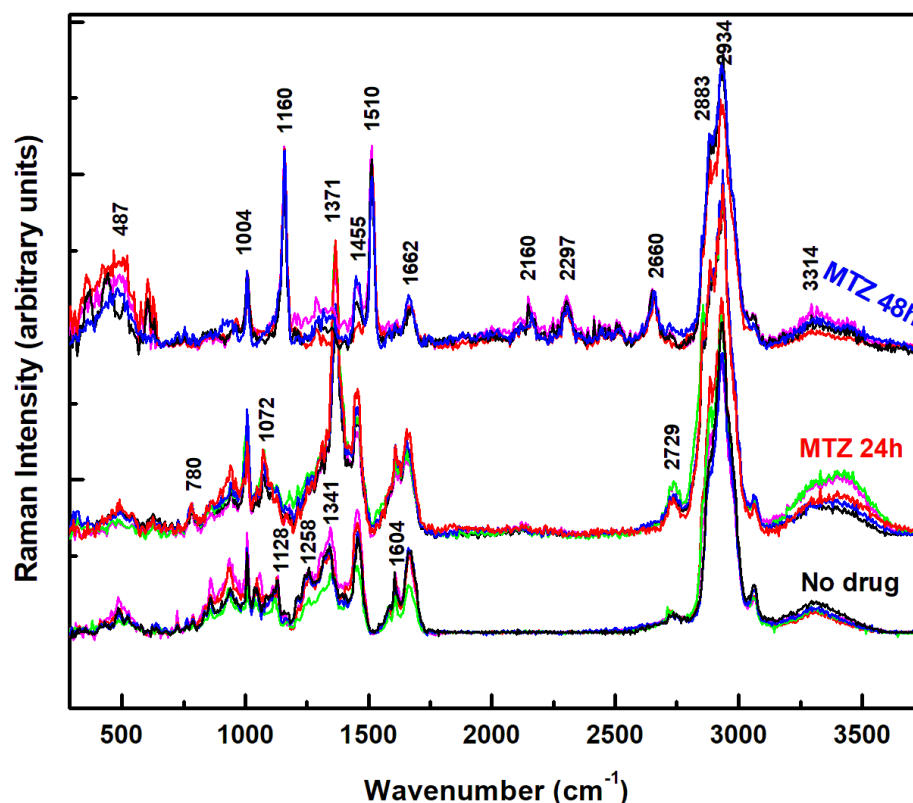

Figure S1. Integrated Raman spectra from different cell images for the untreated and MTZ-treated for 24 h and 48 h (each spectrum averaging 10,000 spectra acquired per image).

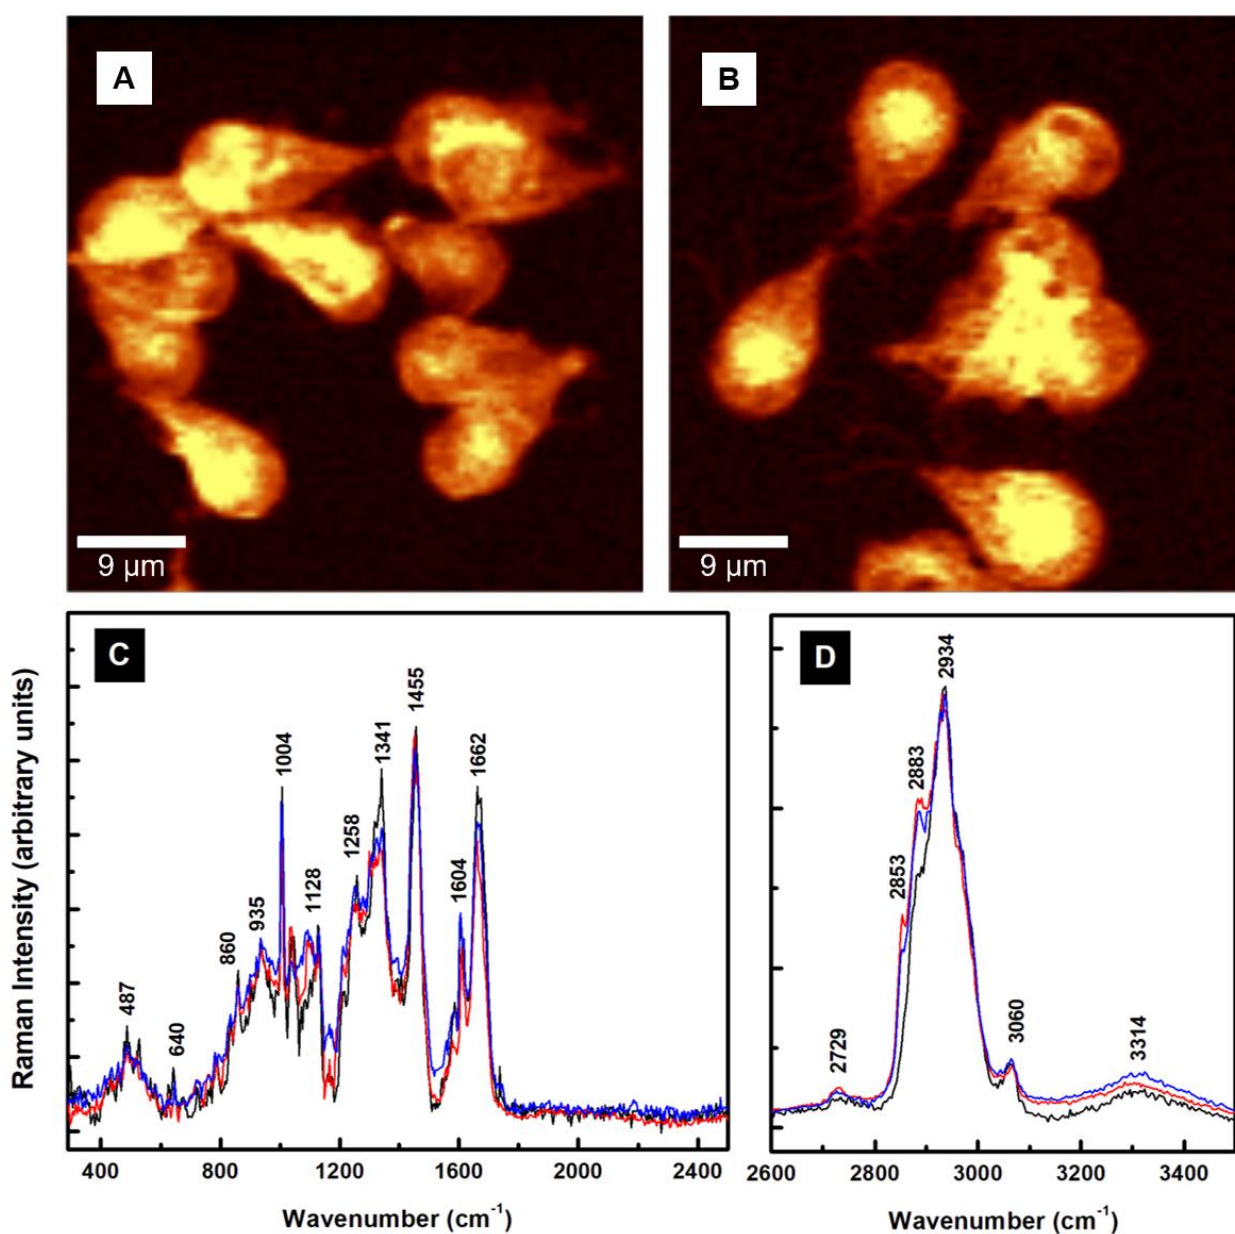

**Figure S2.** DMSO-treated *Giardia* cells: (A,B) Confocal Raman images of cells treated for 24h and 48h, respectively. (C,D) Integrated Raman spectra for 24h (red line) and 48h (blue line) of treatment. The integrated spectrum (black line) of untreated cells is also plotted for reference.

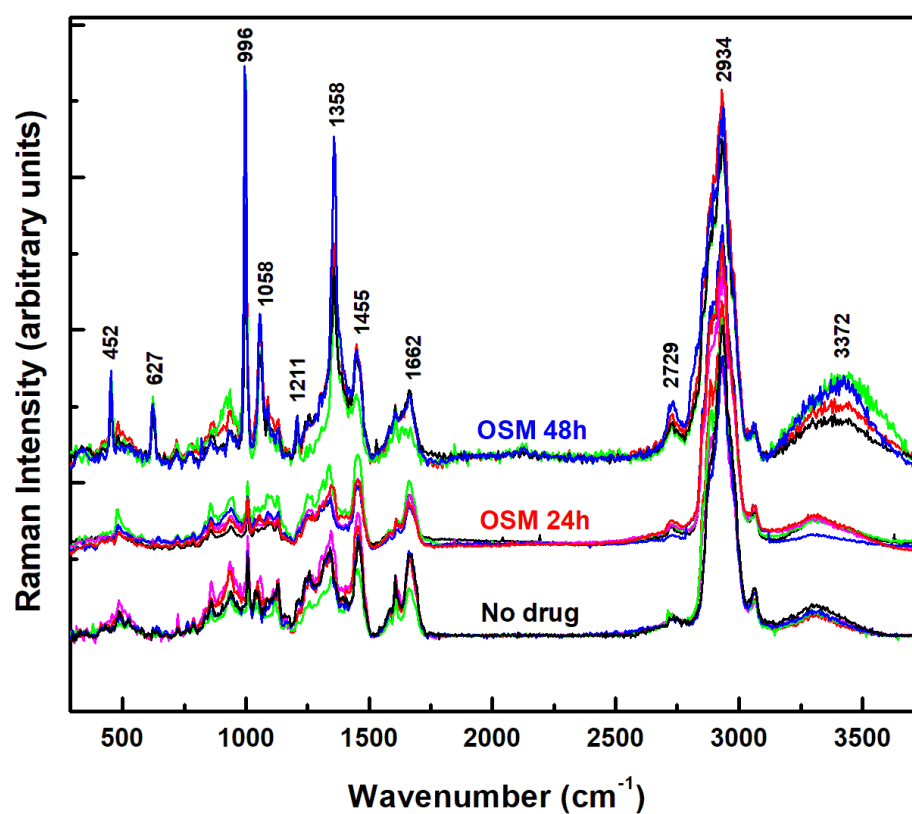

Figure S3. Integrated Raman spectra from different cell images for the untreated and OSM-treated for 24h and 48h (each spectrum averaging 10,000 spectra acquired per image).
